# Supplementary material for: Percutaneous endoscopic gastrostomy versus fluoroscopic gastrostomy in amyotrophic lateral sclerosis (ALS) sufferers with nutritional impairment: A meta-analysis of current studies
Source: PubMed Central journal article supplement (PMC5731950; doi:10.18632/oncotarget.22288), 2017-11-06
Supplement: oncotarget-08-102244-s001.pdf [file oncotarget-08-102244-s001.pdf]

## Percutaneous endoscopic gastrostomy versus fluoroscopic gastrostomy in amyotrophic lateral sclerosis (ALS) sufferers with nutritional impairment: A meta-analysis of current studies

### SUPPLEMENTARY MATERIALS

Supplementary Table 1: Peri-procedural complications of each group

| Study              | Group | Difficult procedure  | Success attempt         | O <sub>2</sub> desaturation | Distress | Respiratory arrest | Laryngeal spasm | Haemorrhage |
|--------------------|-------|----------------------|-------------------------|-----------------------------|----------|--------------------|-----------------|-------------|
| Thornton           | PEG   | 9 in 20 <sup>a</sup> | 11 in 20 <sup>a</sup>   | NA                          | NA       | 1                  | NA              | NA          |
|                    | PRG   | 8 in 25 <sup>a</sup> | 25 in 25 <sup>a</sup>   | NA                          | NA       | 0                  | NA              | NA          |
| A Chio             | PEG   | NA                   | 23                      | NA                          | NA       | NA                 | NA              | NA          |
|                    | PRG   | NA                   | 25                      | NA                          | NA       | NA                 | NA              | NA          |
| Desport            | PEG   | NA                   | NA                      | NA                          | NA       | NA                 | NA              | NA          |
|                    | RIG   | NA                   | NA                      | NA                          | NA       | NA                 | NA              | NA          |
| Shaw               | PEG   | NA                   | NA                      | NA                          | NA       | NA                 | NA              | NA          |
|                    | RIG   | NA                   | NA                      | NA                          | NA       | NA                 | NA              | NA          |
| Blondet            | PEG   | NA                   | 15                      | NA                          | NA       | NA                 | NA              | NA          |
|                    | PRG   | NA                   | 22                      | NA                          | NA       | NA                 | NA              | NA          |
| Allen              | PEG   | 2                    | 48                      | 2                           | 0        | 4                  | NA              | NA          |
|                    | RIG   | 1                    | 50                      | 1                           | 1        | 1                  | NA              | NA          |
| ProGas Study Group | PEG   | 26                   | 160 in 171 <sup>a</sup> | 6                           | 26       | 0                  | 2               | 0           |
|                    | RIG   | 13                   | 118 in 125 <sup>a</sup> | 2                           | 4        | 0                  | 1               | 3           |
|                    | PRG   | 7                    | 42 in 45 <sup>a</sup>   | 3                           | 2        | 0                  | 0               | 0           |

PEG, Percutaneous Endoscopic Gastrostomy; PRG, Per-oral Image-Guided Gastrostomy; RIG, Radiologically Inserted Gastrostomy; NA, Not Applicable. <sup>a</sup>means the incidence number in total events.

Supplementary Table 2: Post-procedural complications of each group. See Supplementary\_Table\_2

Supplementary Table 3: PRISMA checklist. See Supplementary\_Table\_3

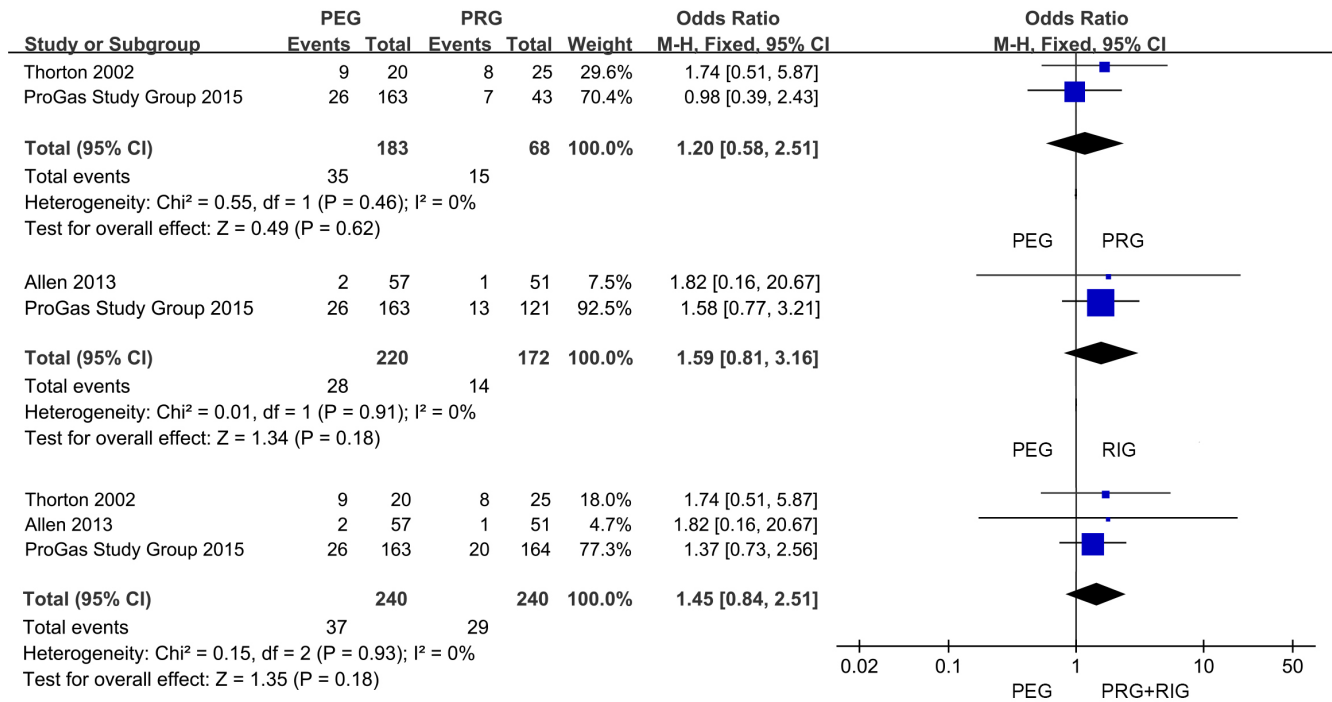

Supplementary Figure 1: Forest plot and meta-analysis of difficult procedure.

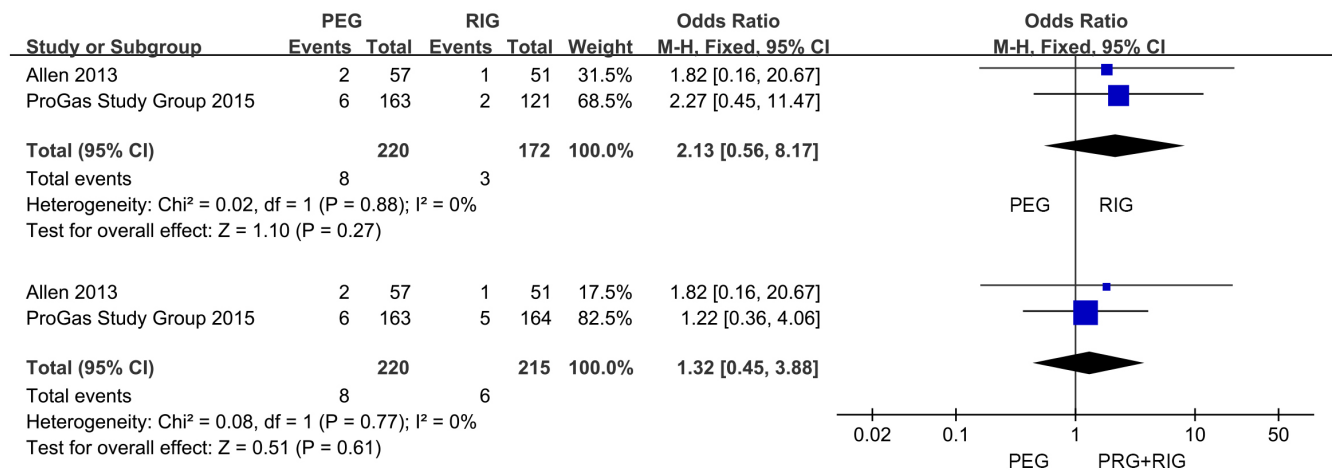

Supplementary Figure 2: Forest plot and meta-analysis of oxygen desaturation.

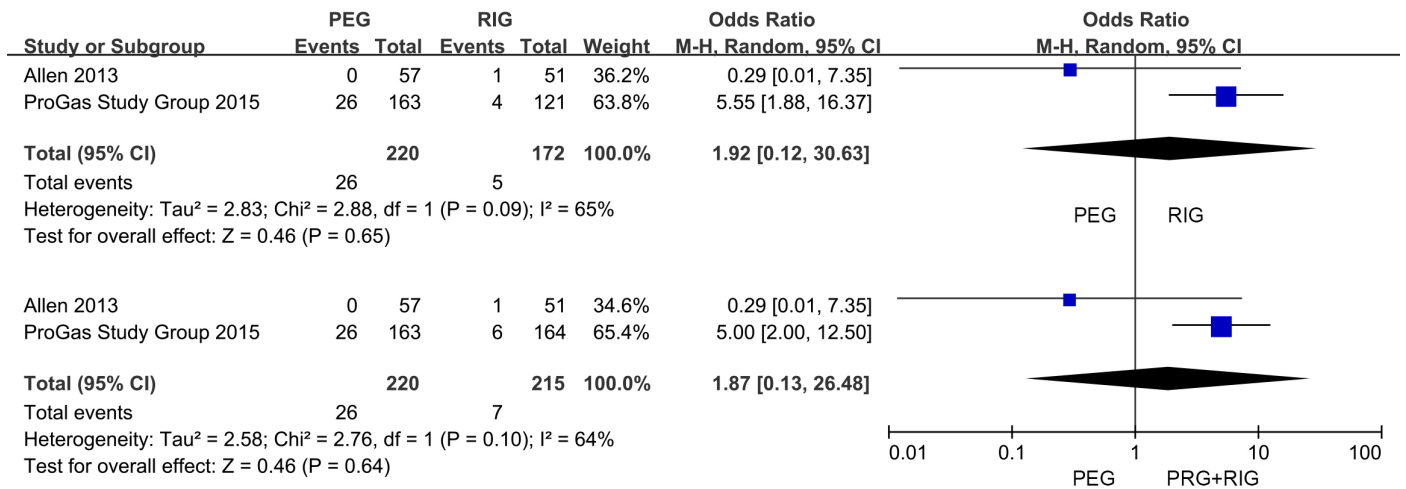

Supplementary Figure 3: Forest plot and meta-analysis of distress occurrence.

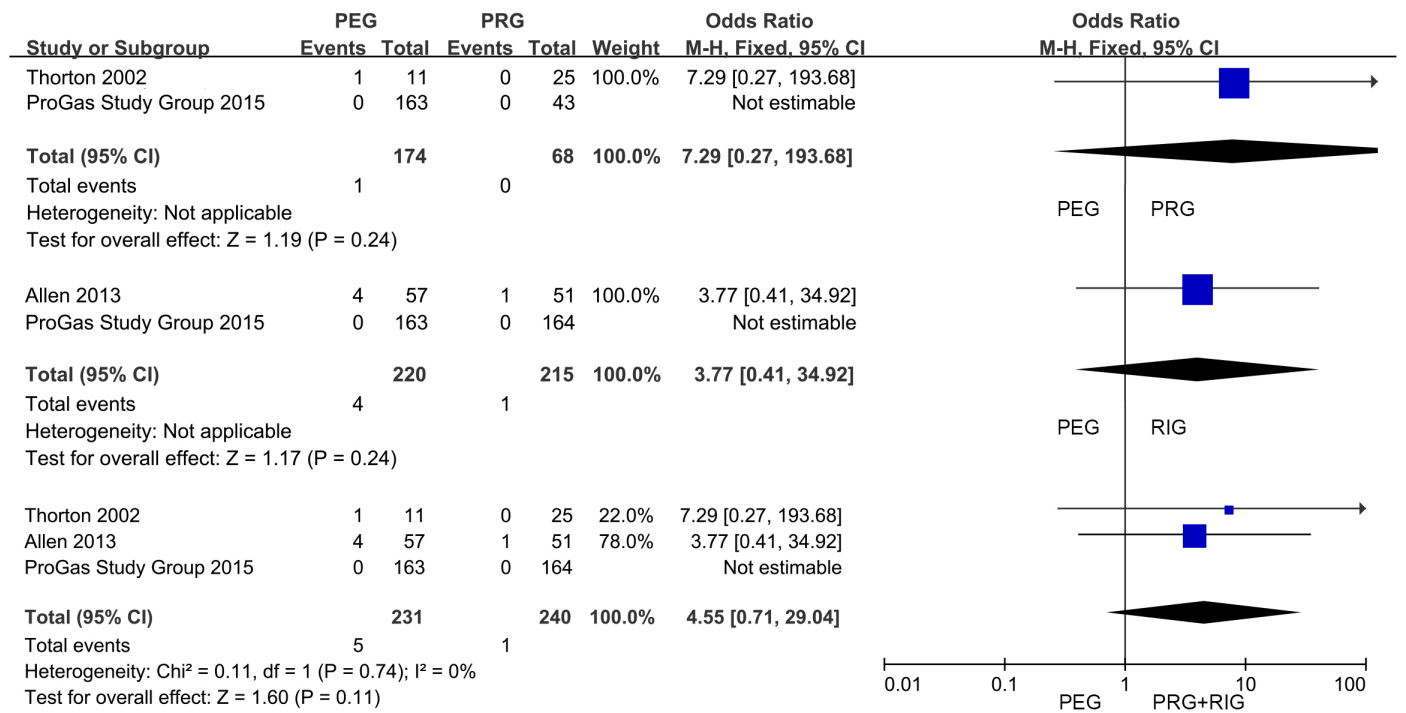

Supplementary Figure 4: Forest plot and meta-analysis of respiratory arrest.

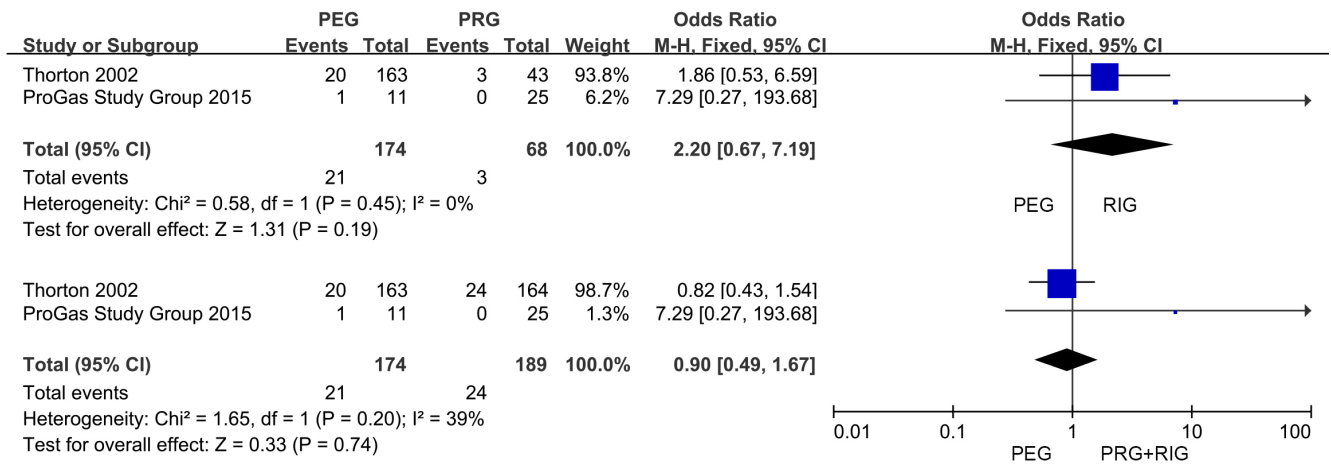

**Supplementary Figure 5: Forest plot and meta-analysis of infection rate.**
